# Supplementary material for: Adjuvant capecitabine plus oxaliplatin after D2 gastrectomy in Japanese patients with gastric cancer: a phase II study
Source: PubMed Central journal article supplement (PMC5321693; doi:10.1007/s10120-016-0606-4), 2016-03-08

Supplementary Figure 1. Disease-free survival in Japanese patients with resected gastric cancer treated with adjuvant XELOX

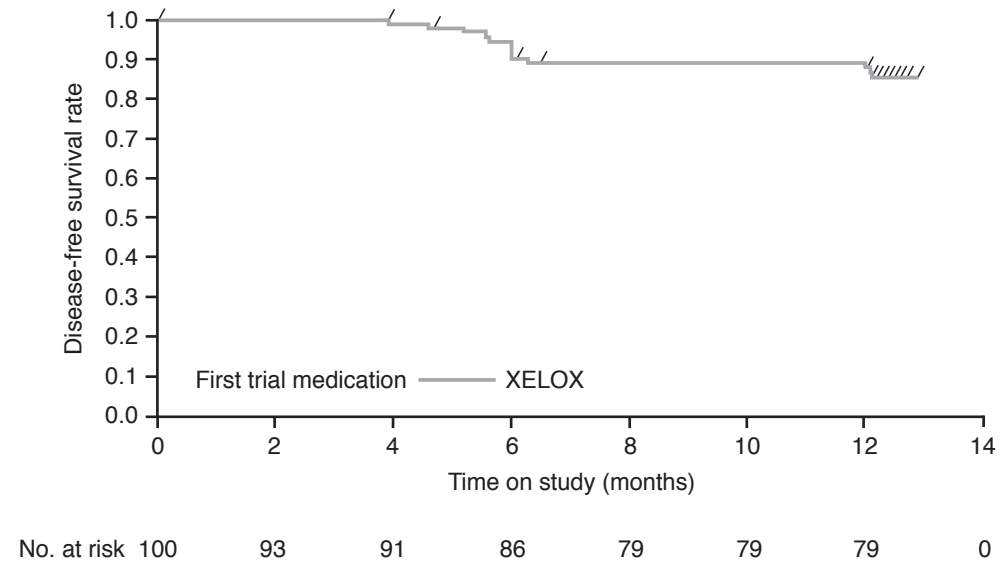

Supplement: 10120_2016_606_MOESM1_ESM.pdf [file 10120_2016_606_MOESM1_ESM.pdf]
